# Supplementary material for: Fully bio-based epoxidized soybean oil thermosets for high performance triboelectric nanogenerators
Source: Royal Society of Chemistry journal article supplement (doi:10.1039/d0gc01738h), 2020-01-01
Supplement: d0gc01738h1.pdf [file d0gc01738h1.pdf]

## Electronic supplementary information (ESI)

### Fully bio-based epoxidized soybean oil thermosets for high performance triboelectric nanogenerator

Jarawee Pansumdaeng,<sup>a</sup> Saman Kuntharin,<sup>b</sup> Viyada Harnchana<sup>b</sup> and Nontipa Supanchaiyamat<sup>a,\*</sup>

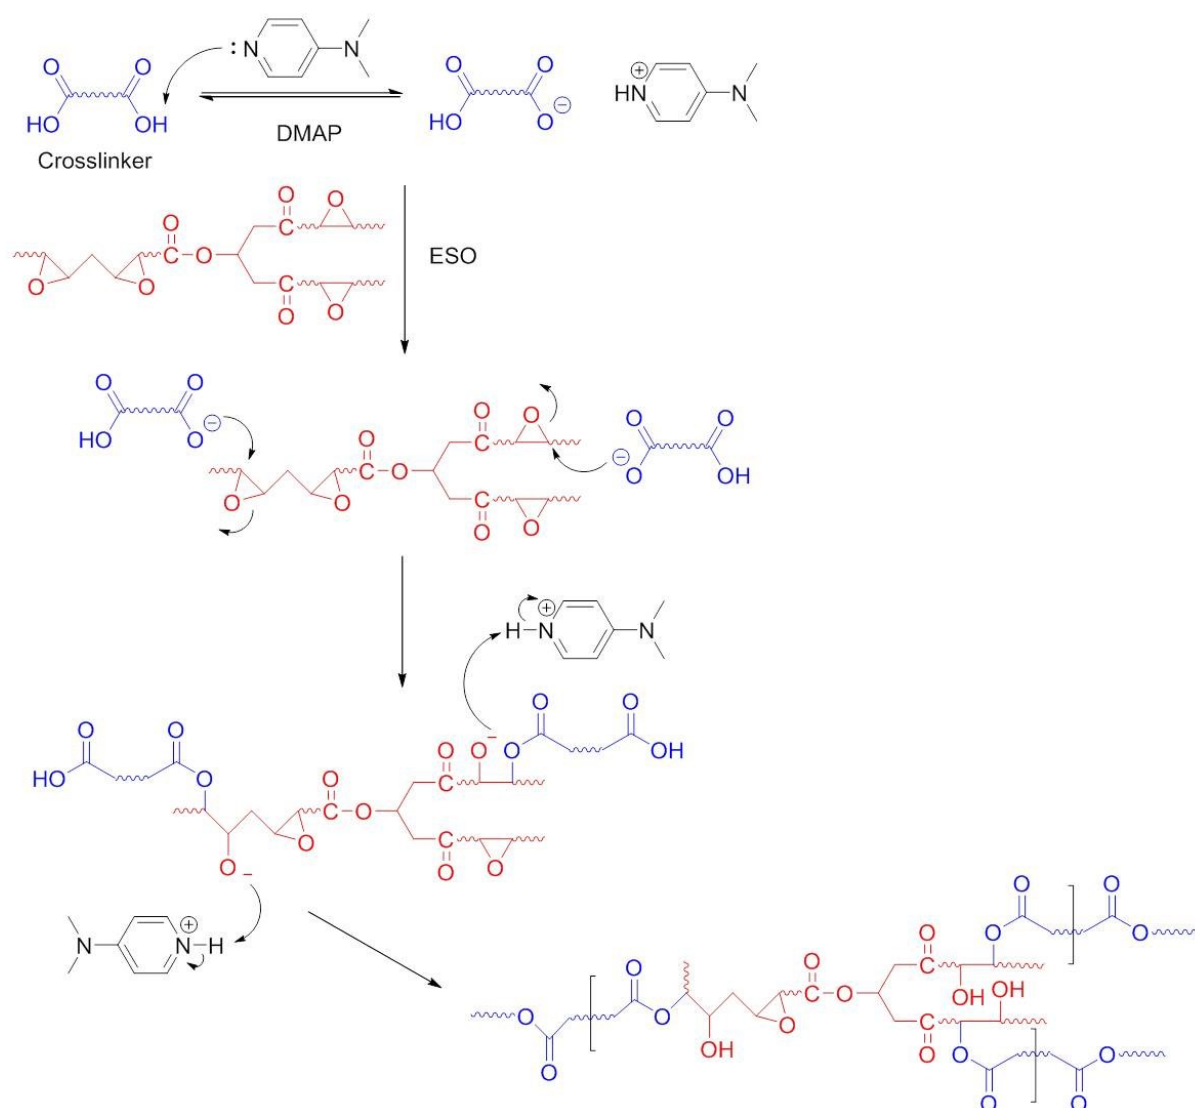

**Fig.S1** Mechanism for curing of ESO and crosslinker in the presence of DMAP

<sup>a</sup> Materials Chemistry Research Center, Department of Chemistry and Center of Excellence for Innovation in Chemistry, Faculty of Science, Khon Kaen University, Khon Kaen, 40002, Thailand. Corresponding authors email: [nontsu@kku.ac.th](mailto:nontsu@kku.ac.th)

<sup>b</sup> Department of Physics, Faculty of Science, Khon Kaen University, Khon Kaen, 40002, Thailand.

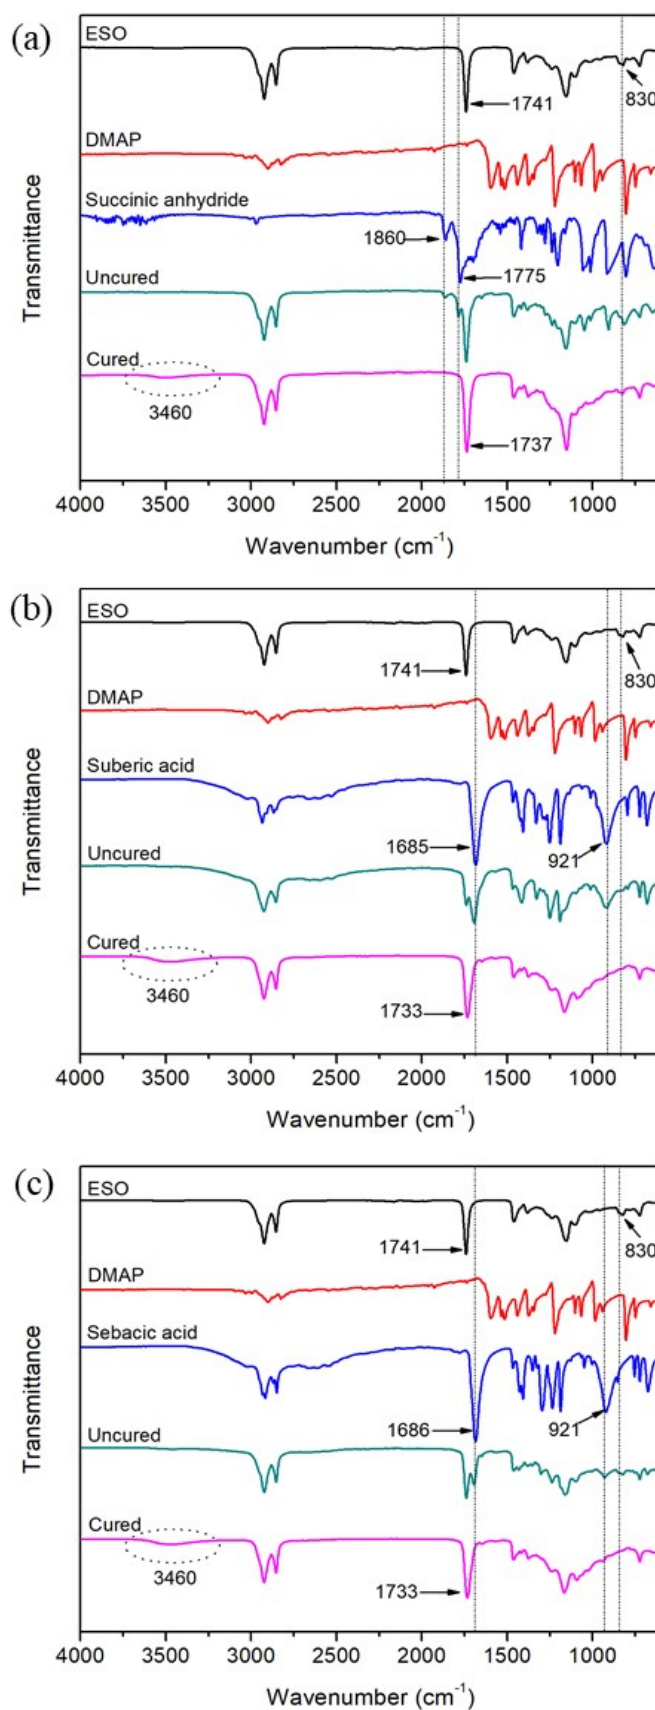

**Fig. S2** FTIR spectra of ESO cured with different crosslinkers.

<sup>a</sup> Materials Chemistry Research Center, Department of Chemistry and Center of Excellence for Innovation in Chemistry, Faculty of Science, Khon Kaen University, Khon Kaen, 40002, Thailand. Corresponding authors email: [nontsu@kku.ac.th](mailto:nontsu@kku.ac.th)

<sup>b</sup> Department of Physics, Faculty of Science, Khon Kaen University, Khon Kaen, 40002, Thailand.
